# Supplementary material for: Dietary supplementation with Lacticaseibacillus rhamnosus IDCC3201 alleviates sarcopenia by modulating the gut microbiota and metabolites in dexamethasone-induced models
Source: Royal Society of Chemistry journal article supplement (doi:10.1039/d3fo05420a), 2024-01-01
Supplement: d3fo05420a1.pdf [file d3fo05420a1.pdf]

## Supporting Information

### **Dietary supplementation with *Lacticaseibacillus rhamnosus* IDCC3201 alleviates sarcopenia by modulating the gut microbiota and metabolites in dexamethasone-induced models**

Minkyung Kang<sup>1</sup>, Minji Kang<sup>1</sup>, Jisun Yoo<sup>1</sup>, Juyeon Lee<sup>1</sup>, Sujeong Lee<sup>1</sup>, Bohyun Yun<sup>2</sup>,  
Minho Song<sup>3</sup>, Jun-Mo Kim<sup>4</sup>, Hyung Wook Kim<sup>5</sup>, Jungwoo Yang<sup>6</sup>, Younghoon Kim<sup>7\*</sup>, and  
Sangnam Oh<sup>1\*</sup>

<sup>1</sup>*Department of Functional Food and Biotechnology, Jeonju University, Jeonju 55069, Korea*

<sup>2</sup>*Honam National Institute of Biological Resources, Mokpo 58762, Korea*

<sup>3</sup>*Department of Animal Science and Biotechnology, Chungnam National University, Daejeon 34134,  
Korea*

<sup>4</sup>*Department of Animal Science and Technology, Chung-Ang University, Anseong 17546, Gyeonggi-  
do, Korea*

<sup>5</sup>*College of Life Sciences, Sejong University, Seoul 05006, Korea*

<sup>6</sup>*Ildong Bioscience, Pyeongtaek-si 17957, Gyeonggi-do, Korea*

<sup>7</sup>*Department of Agricultural Biotechnology and Research Institute of Agriculture and Life Science,  
Seoul National University, Seoul 08826, Korea*

\*To whom correspondence should be addressed: ykeys2585@snu.ac.kr and osangnam@jj.ac.kr

#### **Supplementary Figures.**

Supplementary Figure S1.

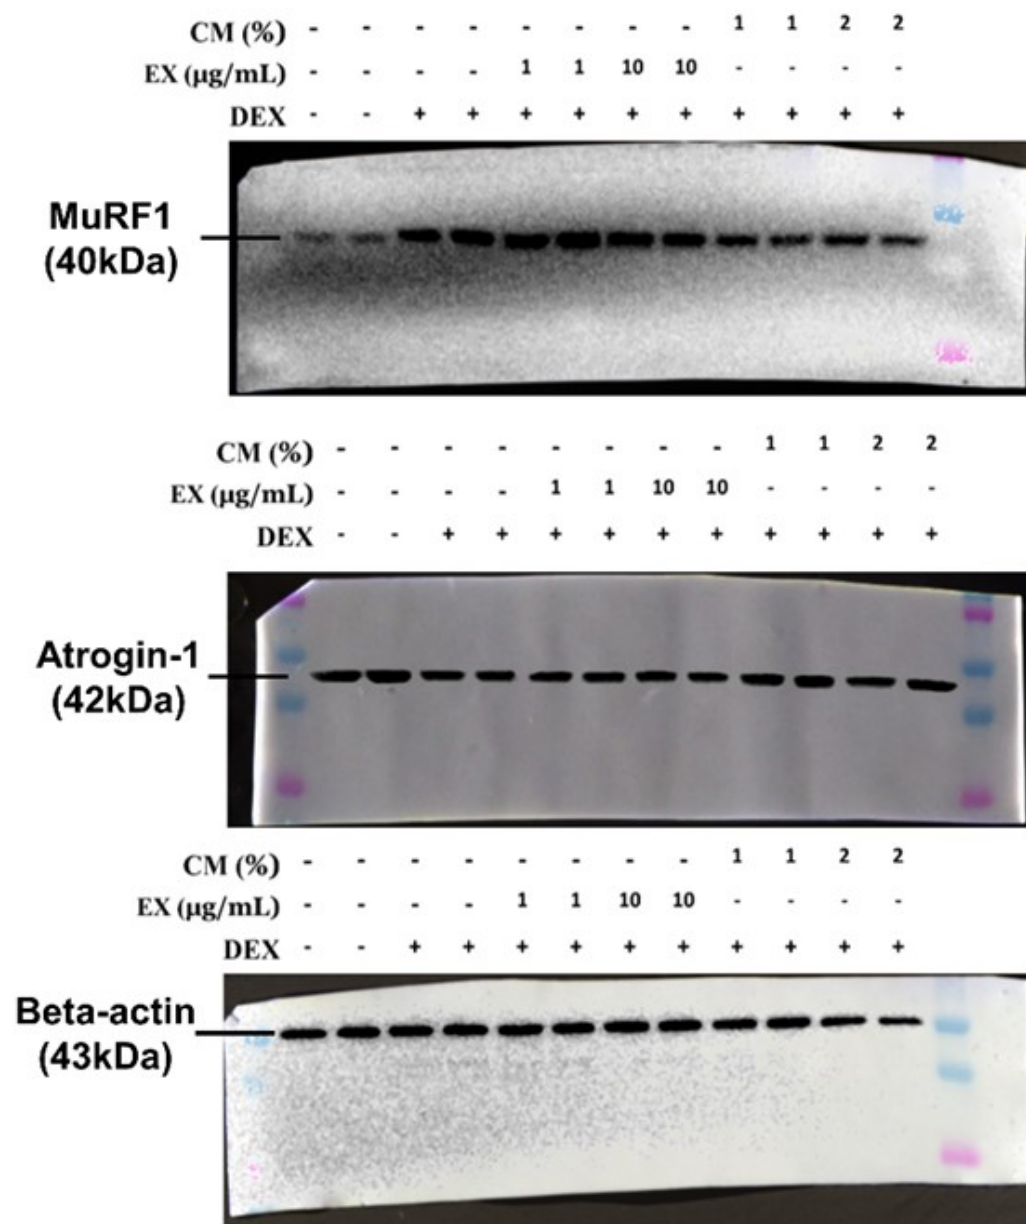

**Fig. S1.** Uncropped images of western blot for all panels shown in Fig. 3D.
